# Supplementary material
Source: ML conference proceedings conference paper supplement (https://openreview.net/forum?id=TX4BUsNGsA)
Supplement: supplementary_material [file checklist.pdf › Gupta_Shivendra_AGI_Assignment_1/admin/checklist.pdf]

# Agents4Science 2025 Compliance Checklist

Anonymous

September 16, 2025

## Conference Compliance (all must be “Yes”)

**C1. AI listed as sole first author in submission metadata; human(s) listed as secondary authors (if any).**

**Answer: Yes ✓.** Notes: Submission metadata reflects AI as first author; human contributors (if any) listed as non-first.

**C2. Paper PDF is anonymous (no names/affiliations/identifiers; acknowledgments removed).**

**Answer: Yes ✓.** Notes: PDF uses the Agents4Science style in anonymous mode; author block anonymized; acknowledgments omitted.

**C3.  $\leq 8$  pages main text (excluding references & required statements).**

**Answer: Yes ✓.** Notes: Main text fits within 8 pages; checklists and references are placed after the main content.

**C4. Conference L<sup>A</sup>T<sub>E</sub>X template used; AI Contribution Disclosure included.**

**Answer: Yes ✓.** Notes: `agents4science_2025.sty` is used; the “Agents4Science AI Involvement Checklist” section is filled.

**C5. Responsible AI / Broader Impact statement present; aligns with NeurIPS Code of Ethics.**

**Answer: Yes ✓.** Notes: A dedicated statement is included in the paper and addresses intended use, risks, and mitigations.

**C6. (Encouraged) Reproducibility statement included.**

**Answer: Yes ✓.** Notes: Reproducibility paragraph and Appendix with exact commands and artifacts are included.

**C7. Submitted via OpenReview to Agents4Science 2025 Conference.**

**Answer: Yes ✓.** Notes: OpenReview submission prepared; forum ID recorded (see `admin/openreview_id.txt`).

**C8. Submission made before Sept 15, 2025 (AOE).**

**Answer: Yes ✓.** Notes: Submission timestamp meets the AOE deadline.

## Course Reproducibility

**R1. All figures generated by scripts included.**

**Answer: Yes ✓.** Notes: Figures are generated by `code/experiment_runner.py` and saved under `results/*/figures/`.

**R2. `code/` has an entrypoint to reproduce results end-to-end.**

**Answer: Yes ✓.** Notes: Run `python code/experiment_runner.py --out results/$(date +%Y%m%d_%H%M%S)` to reproduce logs and plots.

**R3. `data/` contains synthetic sample or data-generation script and licensing notes.**

**Answer: Yes ✓.** Notes: Synthetic data are generated in-code (`implementation.py`); `data/README.md` and `metadata.json` document this.

**R4. `prompts/ai_contrib_log.md` documents AI vs. human roles; `admin/openreview_id.txt` filled.**

**Answer: Yes ✓.** Notes: Prompt log curated; OpenReview forum ID stored upon submission.

*Contact for questions:* Anonymous authors (per double-blind policy). Repository contains `README.md`, `requirements.txt`, and all artifacts referenced in the paper.
