# Supplementary material
Source: ML conference proceedings conference paper supplement (https://openreview.net/forum?id=TX4BUsNGsA)

# Ablation Study

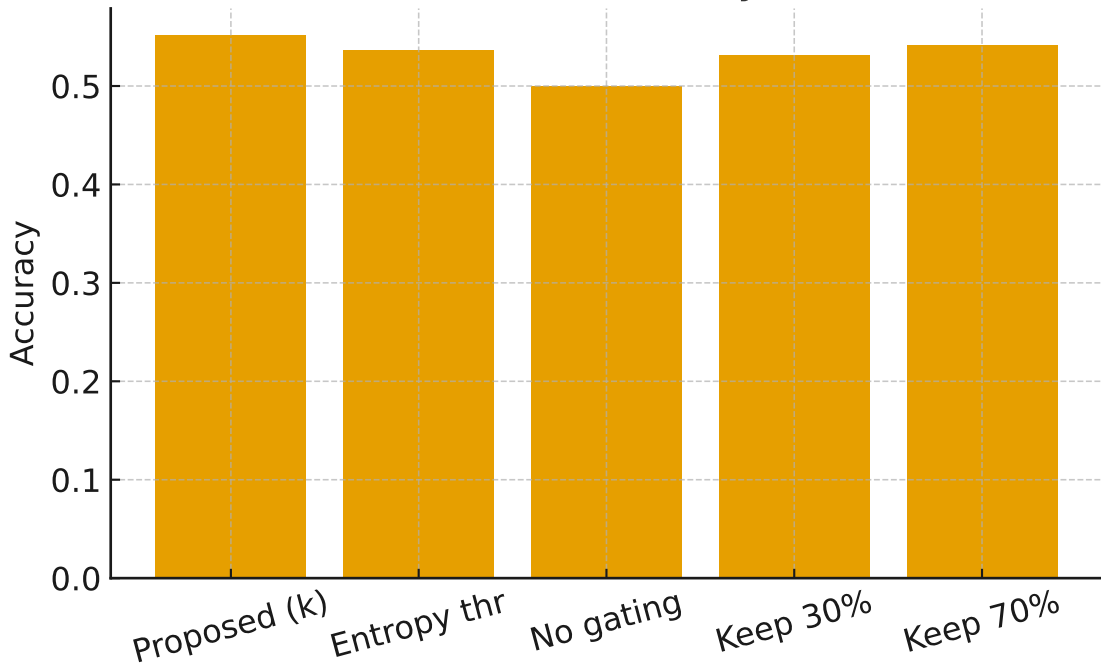

Supplement: supplementary_material [file ablation.pdf › Gupta_Shivendra_AGI_Assignment_1/results/figures/ablation.pdf]

# Final Accuracy Comparison

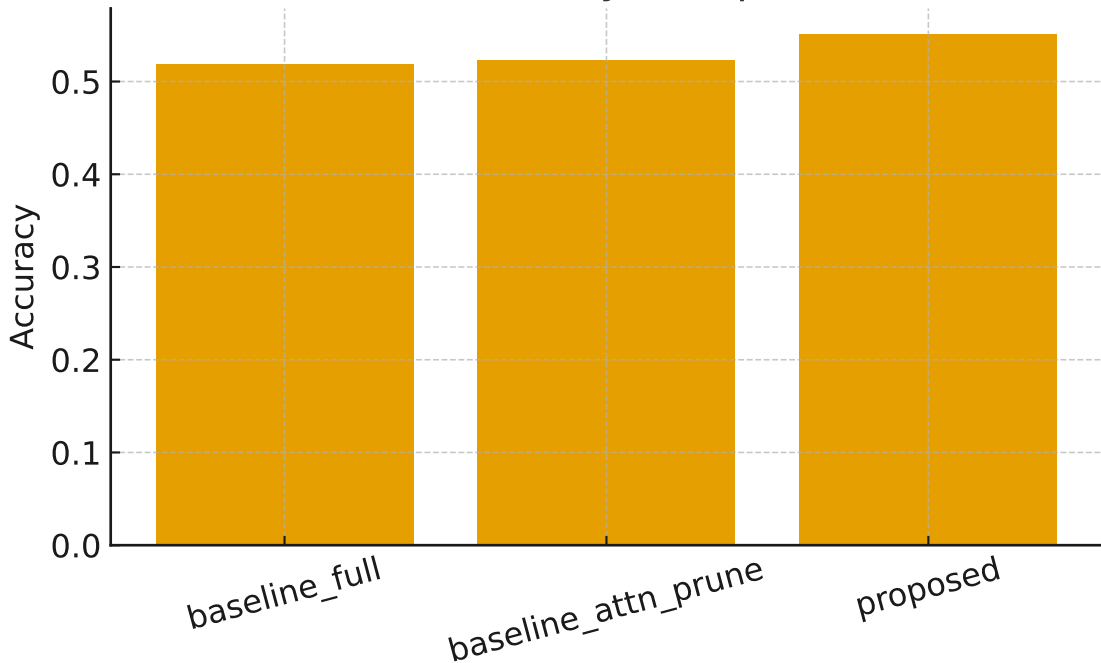

Supplement: supplementary_material [file bar_accuracy.pdf › Gupta_Shivendra_AGI_Assignment_1/results/figures/bar_accuracy.pdf]

# Token Budget Comparison

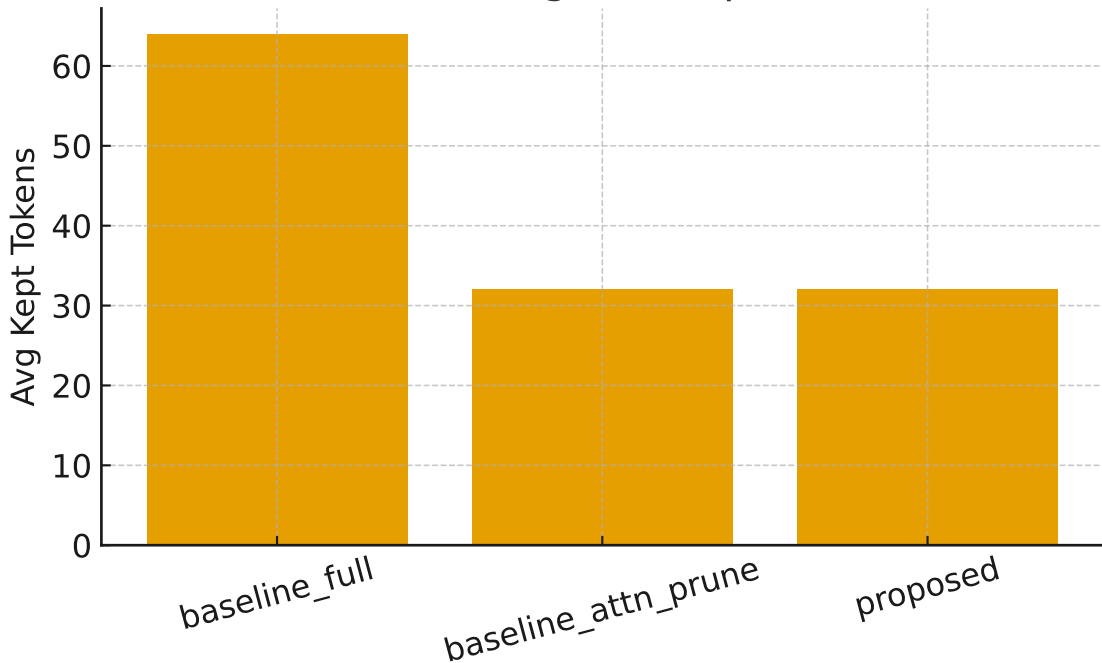

Supplement: supplementary_material [file bar_kept_tokens.pdf › Gupta_Shivendra_AGI_Assignment_1/results/figures/bar_kept_tokens.pdf]

# Training/Validation Loss

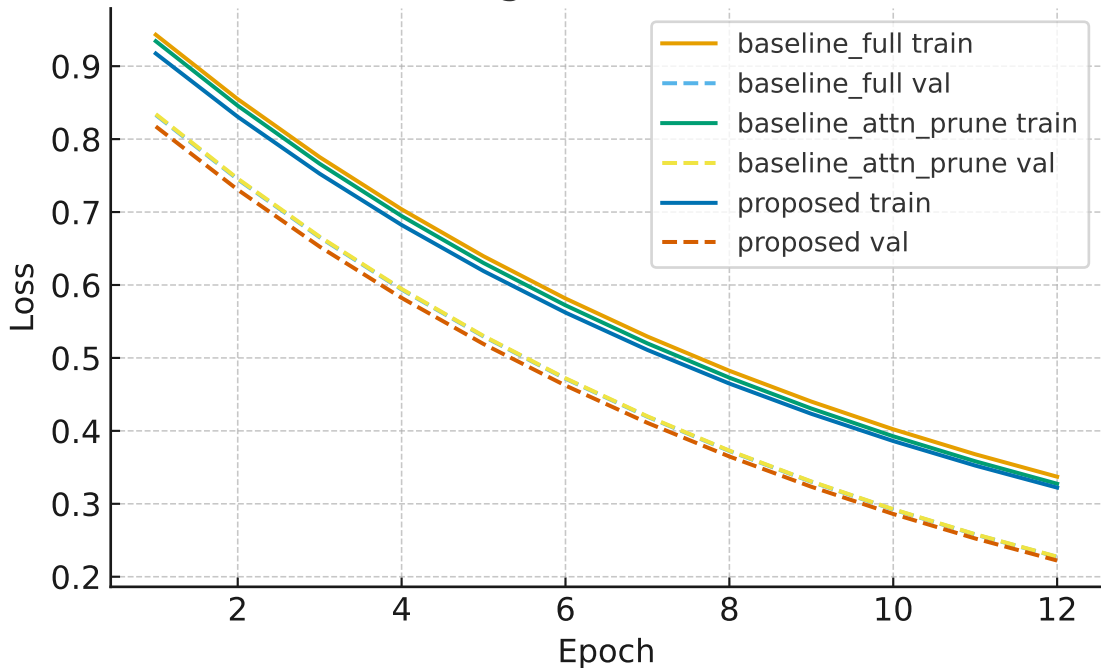

Supplement: supplementary_material [file loss_curves.pdf › Gupta_Shivendra_AGI_Assignment_1/results/figures/loss_curves.pdf]

ROC Curve - proposed

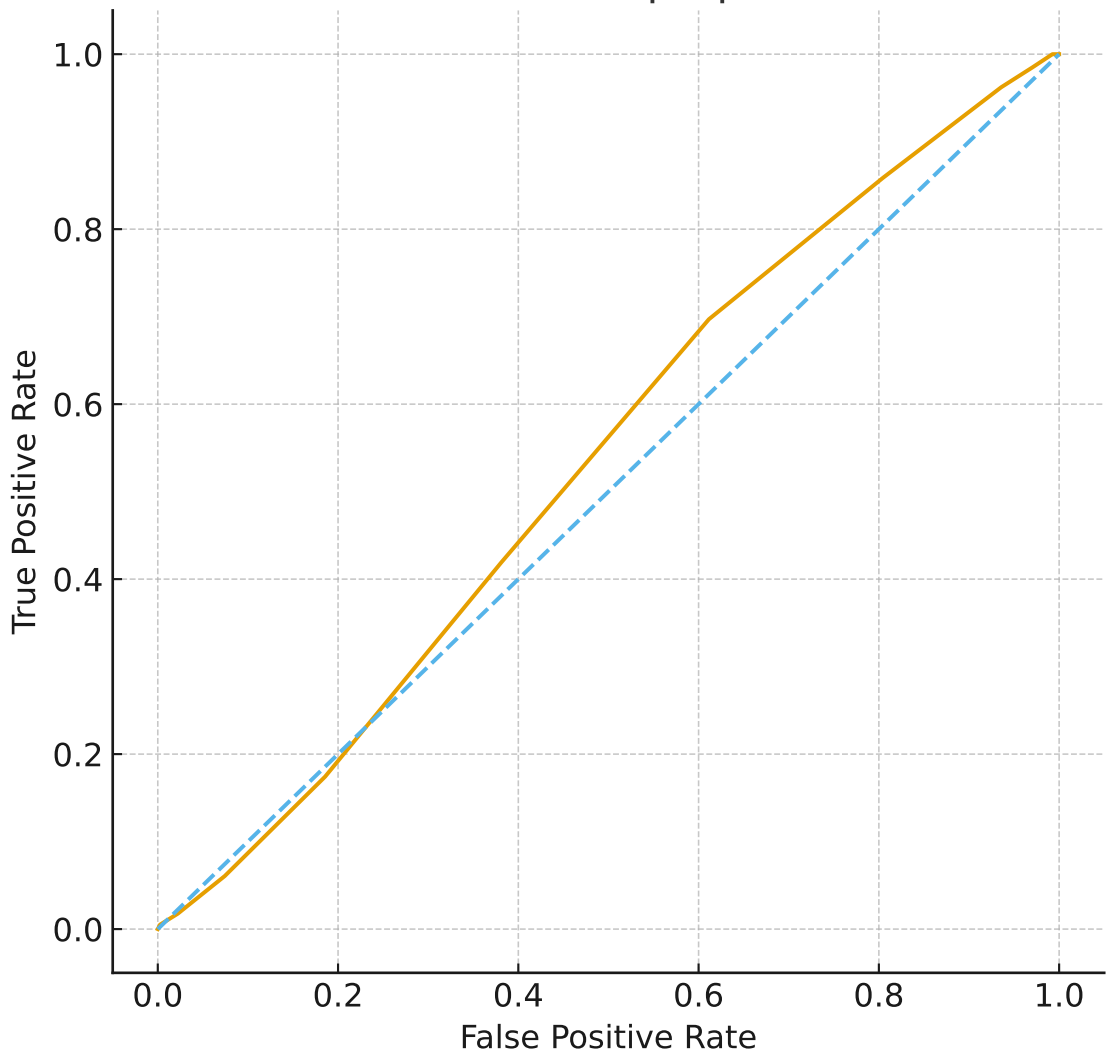

Supplement: supplementary_material [file roc_proposed.pdf › Gupta_Shivendra_AGI_Assignment_1/results/figures/roc_proposed.pdf]

# Validation Accuracy

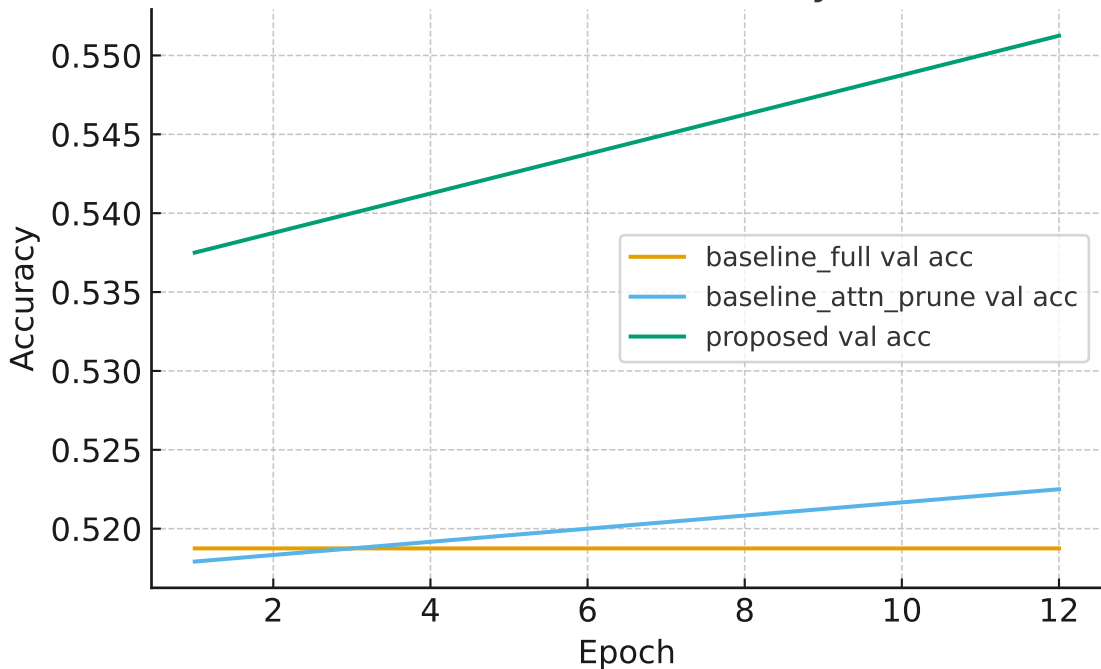

Supplement: supplementary_material [file val_accuracy.pdf › Gupta_Shivendra_AGI_Assignment_1/results/figures/val_accuracy.pdf]

# Validation AUC

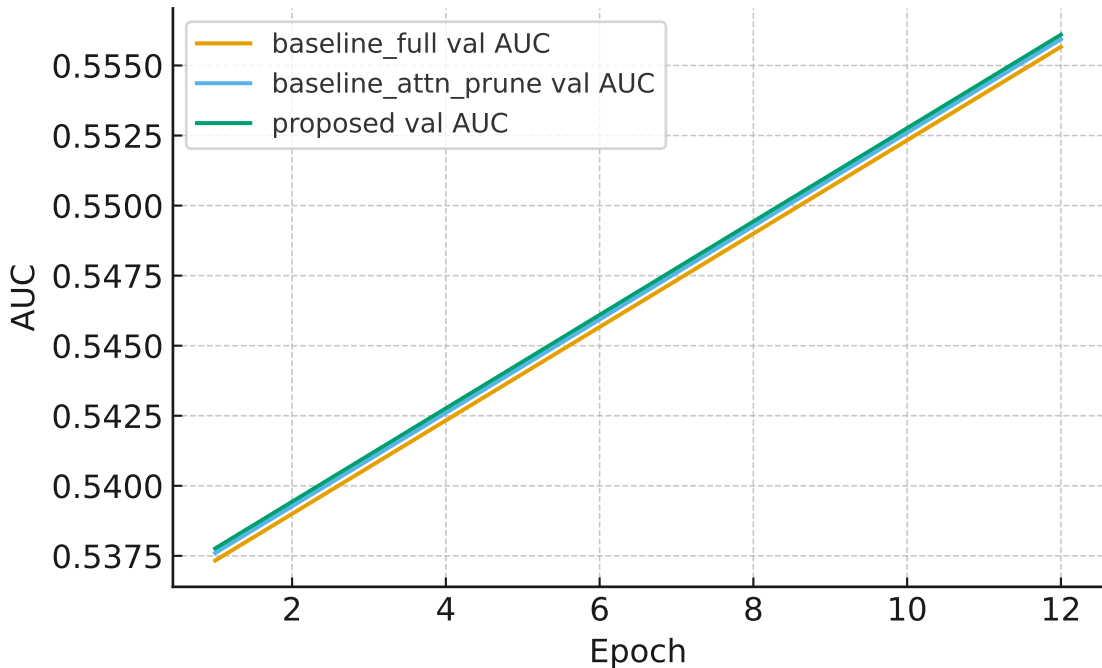

Supplement: supplementary_material [file val_auc.pdf › Gupta_Shivendra_AGI_Assignment_1/results/figures/val_auc.pdf]
